# Supplementary material
Source: Springer Nature journal article supplement (https://www.springermedizin.de/resource/supplementary/13024_2013_508_MOESM6_ESM.pdf/9644094)

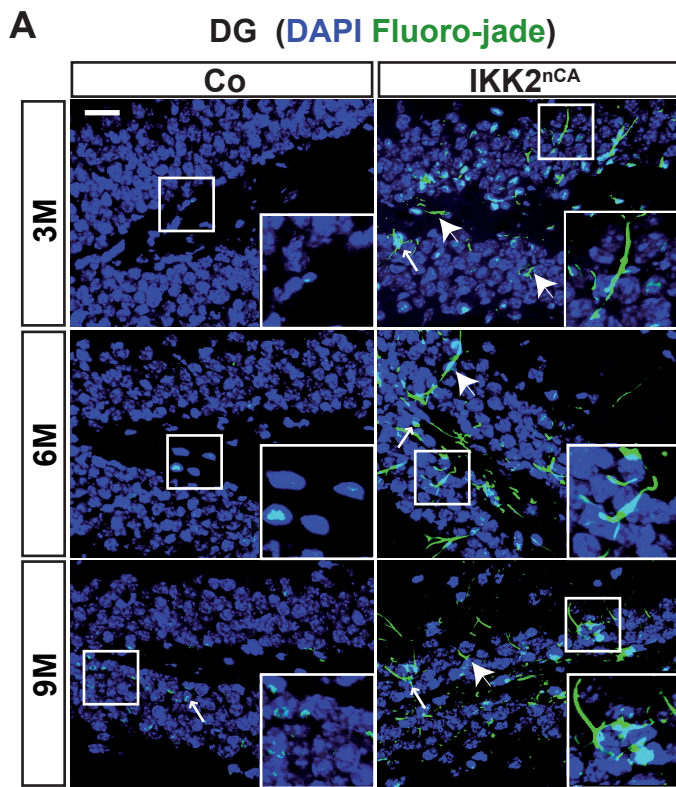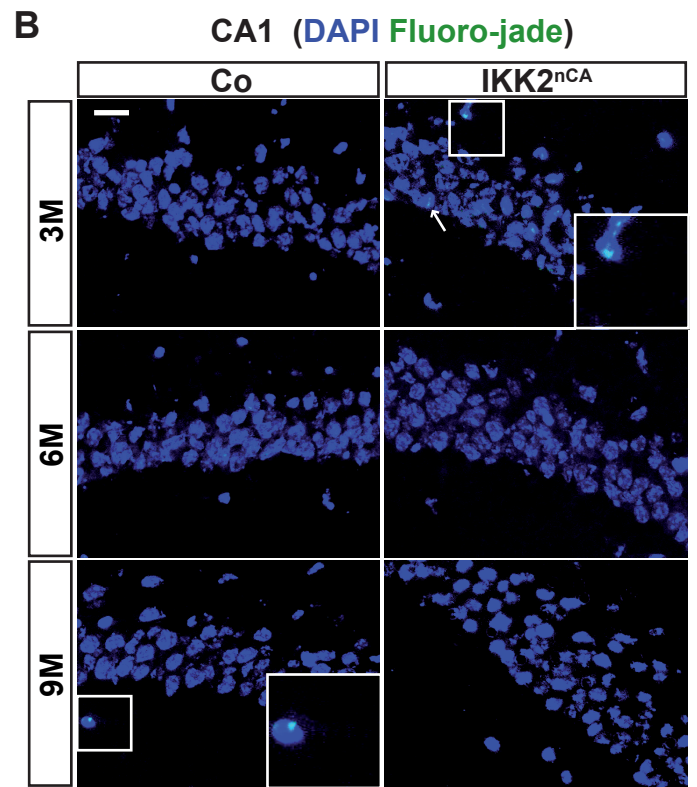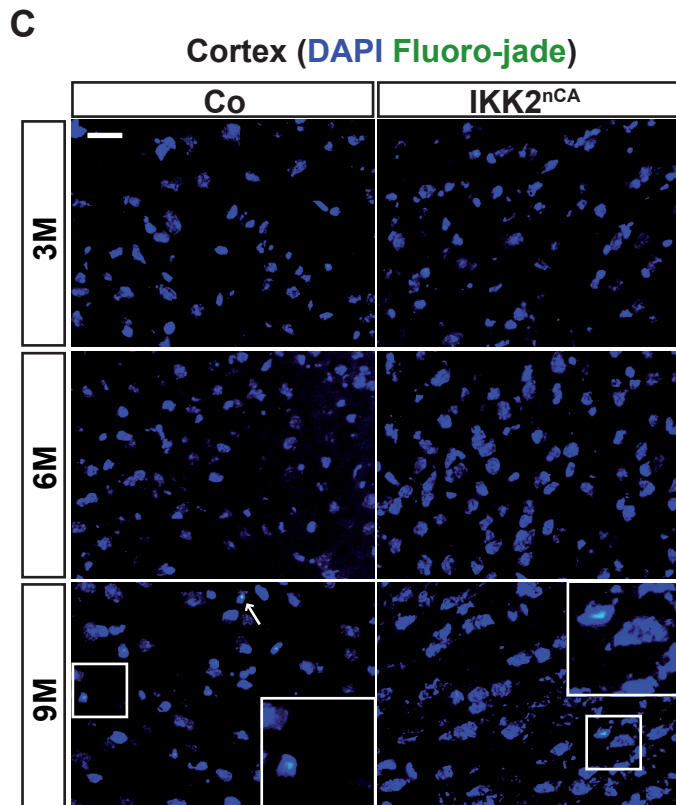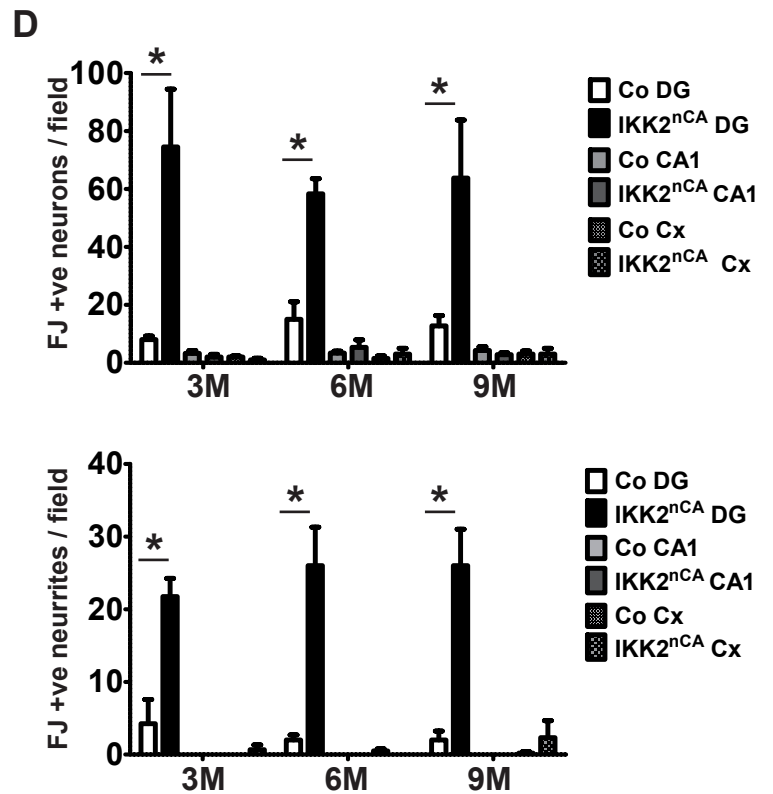

Olfactory bulb (GCL) (DAPI Fluoro-jade)

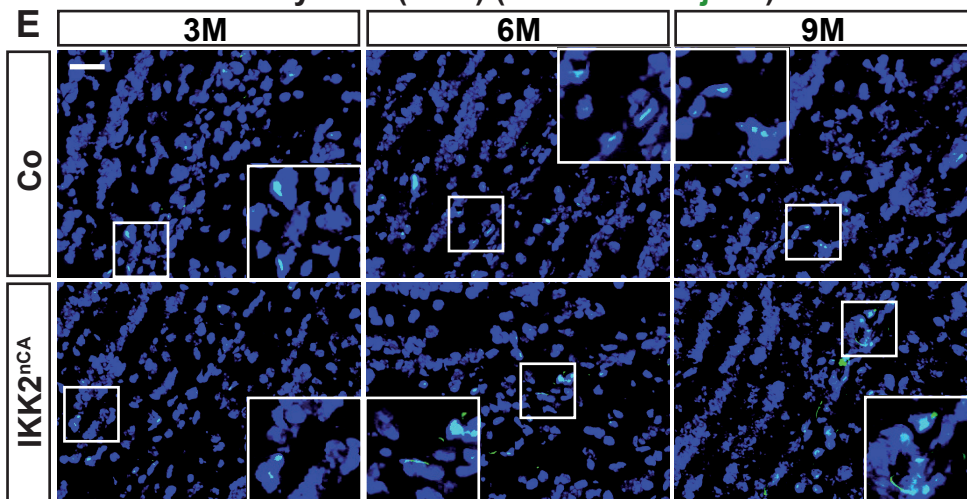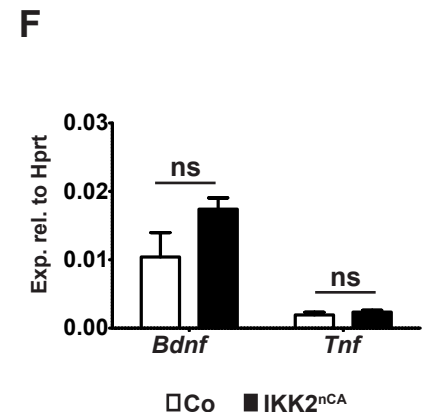

Supplement: MOESM6 [file 9644094]
